# Supplementary material
Source: PubMed Central journal article supplement (PMC8966239)
Supplement: 40337_2022_563_MOESM1_ESM.pdf [file 40337_2022_563_MOESM1_ESM.pdf]

**Additional file 1.** Pubmed/MEDLINE Search Strategy

Strategy for PUBMED (Medline) database: conducted August 2021.

(A similar strategy was used in other databases).

| Search | Query                                                                                                                                                                                                                                                                                                                                                                                                                                                                                                           | Records retrieved |
|--------|-----------------------------------------------------------------------------------------------------------------------------------------------------------------------------------------------------------------------------------------------------------------------------------------------------------------------------------------------------------------------------------------------------------------------------------------------------------------------------------------------------------------|-------------------|
| #1     | "COVID-19"[Mesh] OR (COVID 19) OR (COVID-19) OR (2019-nCoV) OR (nCoV) OR (Covid19) OR (SARS-CoV) OR (SARSCov2 or ncov*) OR (SARSCov2) OR (2019 coronavirus*) OR (2019 corona virus*) OR (Coronavirus (COVID-19)) OR (2019 novel coronavirus disease) OR (COVID-19 pandemic) OR (COVID-19 virus infection) OR (coronavirus disease-19) OR (2019 novel coronavirus infection) OR (2019-nCoV infection) OR (coronavirus disease 2019) OR (2019-nCoV disease) OR (COVID-19 virus disease) OR (coronavirus pandemic) | 172,014           |
| #2     | "Weight Prejudice"[Mesh] OR (weight prejudice) OR (Obesity Bias) OR (weight stigma*) OR (discriminat*)                                                                                                                                                                                                                                                                                                                                                                                                          | 286,638           |
| #3     | #1 AND #2                                                                                                                                                                                                                                                                                                                                                                                                                                                                                                       | 1266              |
